# Supplementary material for: Organotemplate-free synthesis of two open-framework metal borophosphates
Source: Royal Society of Chemistry journal article supplement (doi:10.1039/c5dt02637g), 2015-01-01
Supplement: c5dt02637g1.pdf [file c5dt02637g1.pdf]

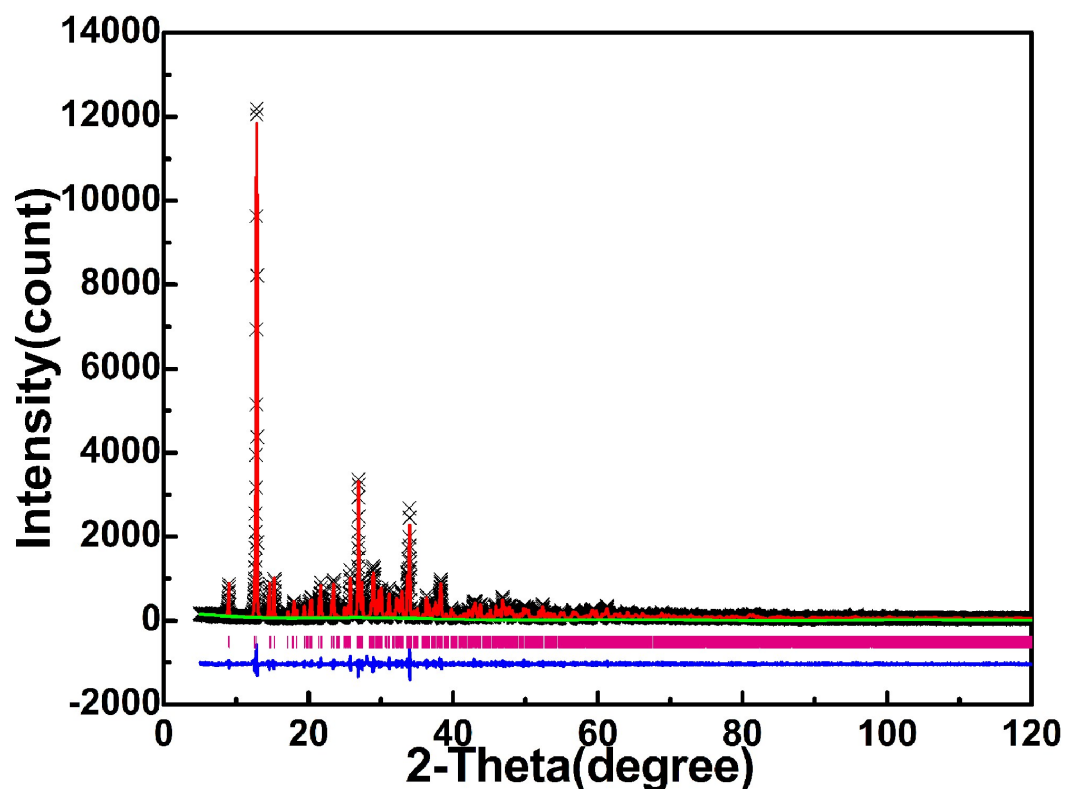

**Figure S1.** Observed, calculated and difference XRD profiles for **2**. The observed data are indicated by multiplication signs and the profiles calculated by Rietveld refinement and the differences between the observed and calculated patterns are shown by solid lines. The short vertical lines below the profiles mark the positions of all possible Bragg reflections. All peaks were indexed with the lattice parameters refined by the Rietveld analysis:  $a = 9.735015 \text{ \AA}$ ,  $b = 12.227146 \text{ \AA}$ ,  $c = 19.887405 \text{ \AA}$ ,  $\alpha = 90^\circ$ ,  $\beta = 90^\circ$  and  $\gamma = 90^\circ$ , which agreed with those of single crystal XRD for **1** (Table 1).  $R_p = 0.0865$ ,  $R_{wp} = 0.1145$  and  $\text{CHI}^2 = 1.884$ .

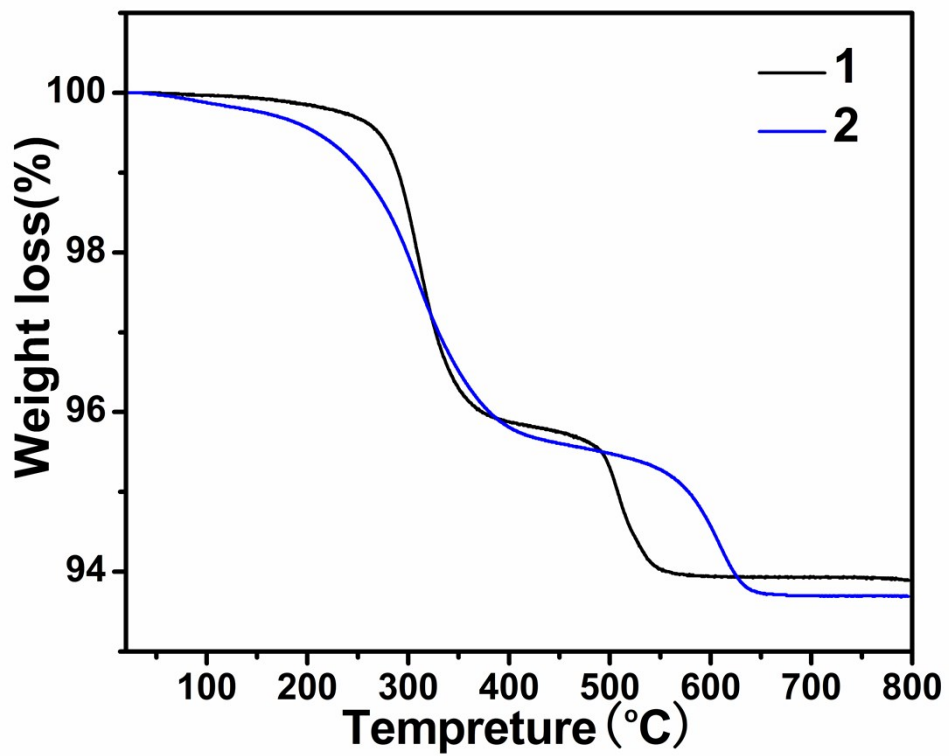

Figure S2. TG curves of 1 and 2.

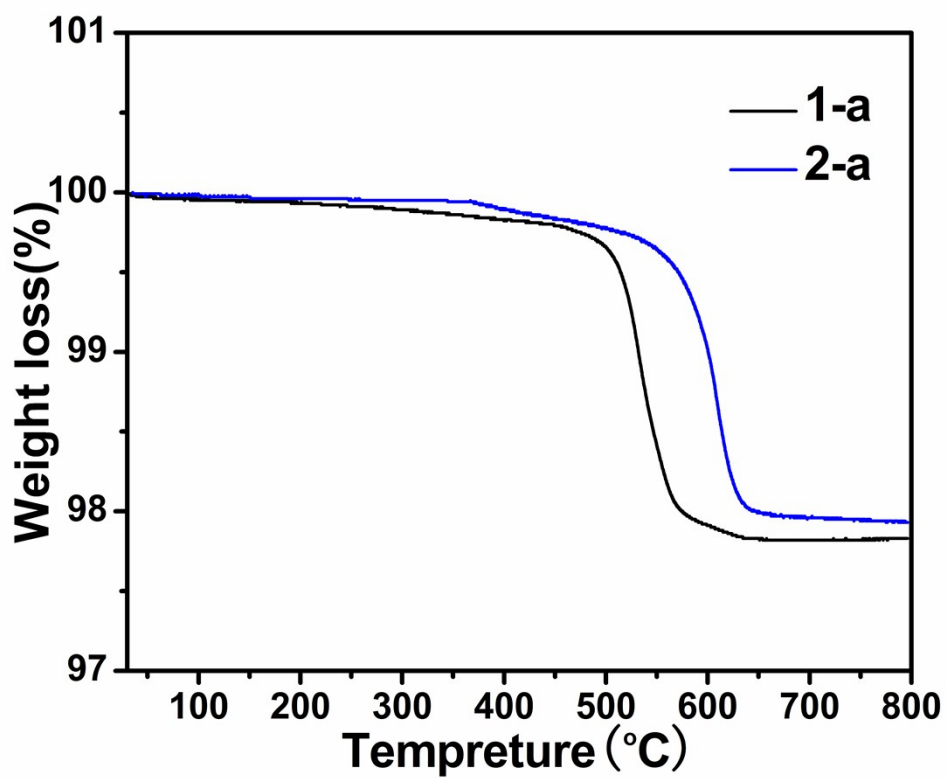

**Figure S3.** TG curves of **1** heating 10 h at 400 °C (**1-a**) and **2** heating 10 h at 400 °C (**2-a**).

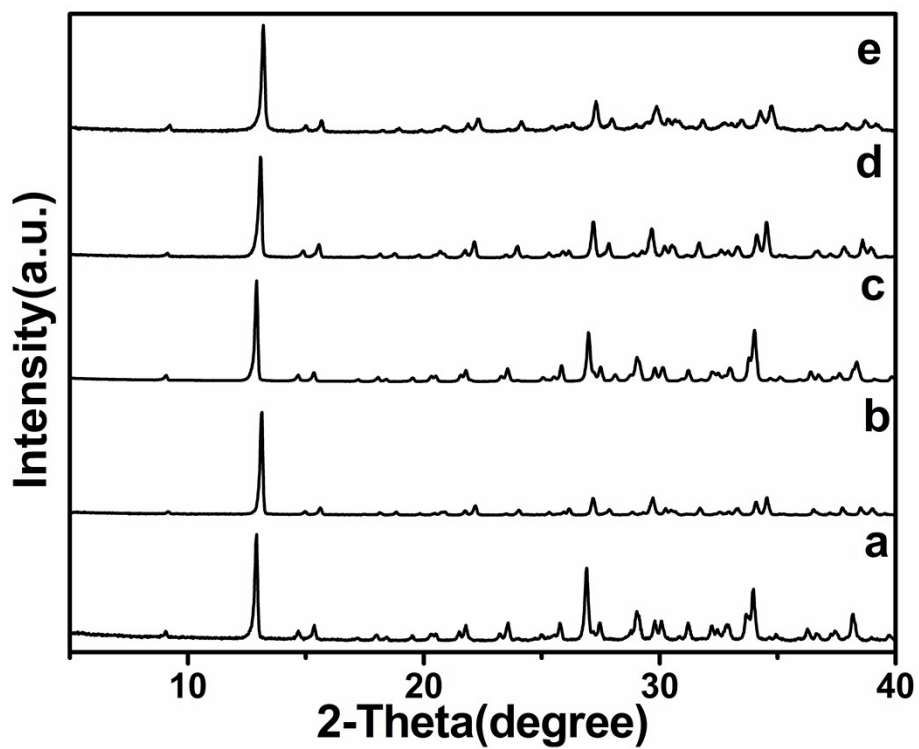

**Figure S4.** XRD patterns of as-prepared **1** (a), **1** heating 10 h at 400 °C (b), as-prepared **2** (c), **2** heating 10 h at 400 °C (d) and **2** heating 10 h at 500 °C (e).

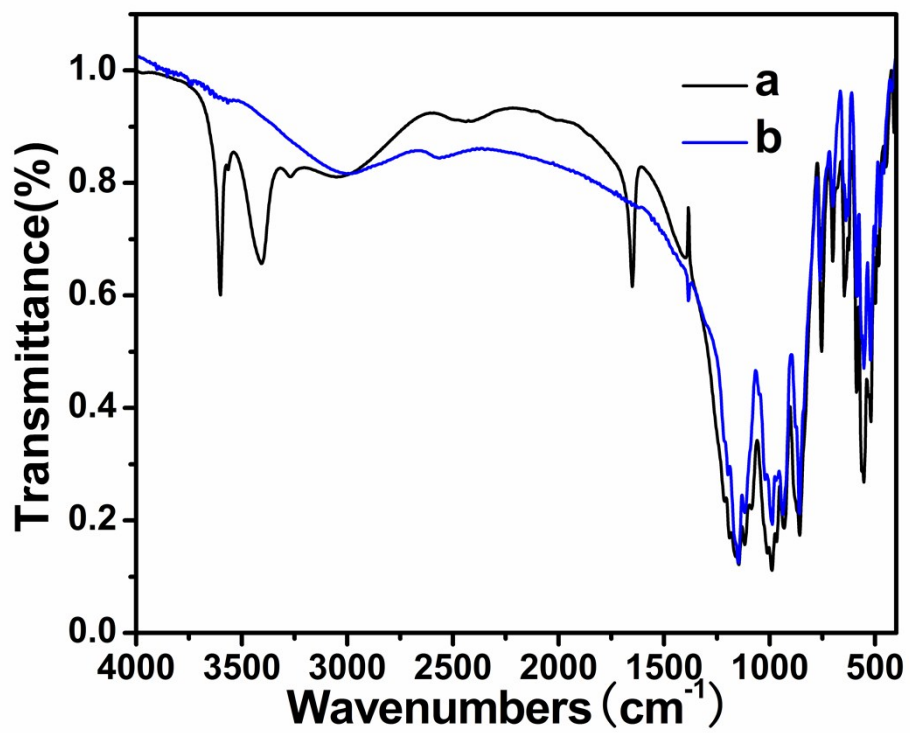

**Figure S5.** IR spectrum of **1** (a) and **1** heating 10 h at 400 °C (b)

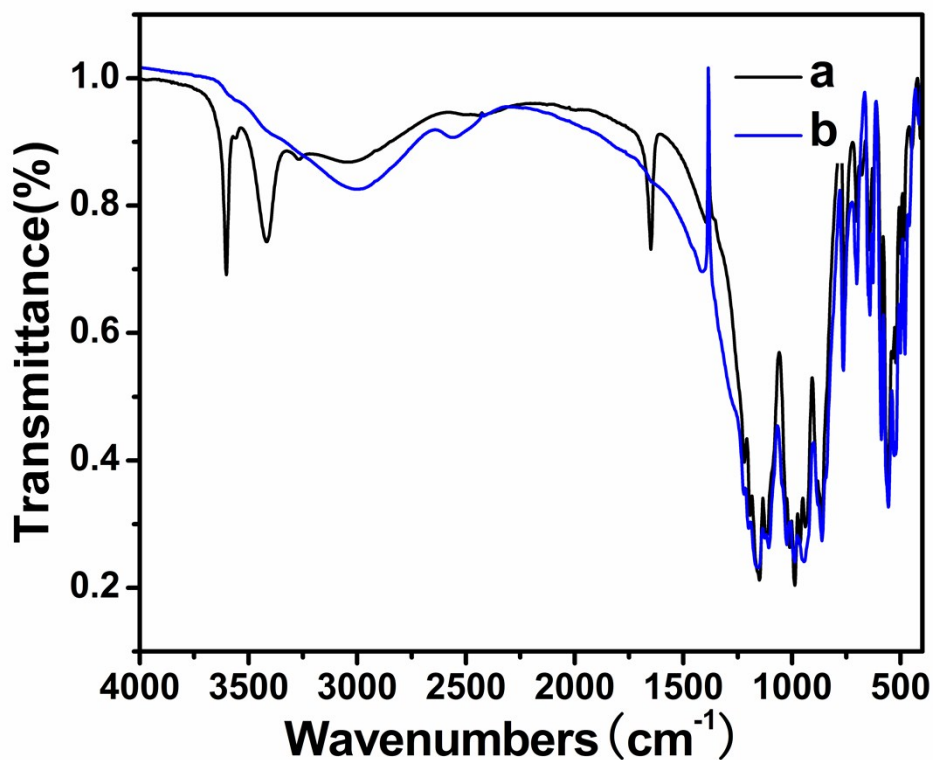

**Figure S6.** IR spectrum of **2** (a) and **2** heating 10 h at 400 °C (b)

**Table S1.** Selected bond lengths [ $\text{\AA}$ ] and angles [deg] for **1**.

|              |          |               |          |
|--------------|----------|---------------|----------|
| K(1)-O(14)#1 | 2.604(4) | K(1)-O(1)     | 2.698(2) |
| K(1)-O(7)#2  | 2.802(2) | K(1)-O(9)#3   | 2.857(2) |
| K(1)-O(8)#3  | 2.944(2) | K(1)-O(11)#4  | 2.974(3) |
| K(1)-O(2)    | 2.995(3) | K(1)-O(10)#4  | 3.292(2) |
| K(2)-O(14)   | 2.687(4) | K(2)-O(8)#5   | 2.701(3) |
| K(2)-O(13)   | 2.815(3) | K(2)-O(11)#6  | 2.856(3) |
| K(2)-O(4)#5  | 2.874(3) | K(2)-O(4)     | 2.953(3) |
| K(2)-O(12)   | 2.971(3) | K(2)-O(2)     | 3.078(3) |
| Co(1)-O(12)  | 2.025(2) | Co(1)-O(13)#6 | 2.081(2) |
| Co(1)-O(4)#3 | 2.112(2) | Co(1)-O(8)#3  | 2.119(2) |
| Co(1)-O(2)   | 2.130(2) | Co(1)-O(6)#3  | 2.158(2) |
| P(1)-O(4)    | 1.504(2) | P(1)-O(2)     | 1.522(2) |
| P(1)-O(3)    | 1.554(2) | P(1)-O(1)     | 1.566(2) |
| P(2)-O(8)    | 1.497(2) | P(2)-O(9)     | 1.547(2) |
| P(2)-O(5)#8  | 1.556(2) | P(2)-O(7)     | 1.561(2) |
| P(3)-O(12)   | 1.500(3) | P(3)-O(13)    | 1.505(2) |

|                      |            |                      |            |
|----------------------|------------|----------------------|------------|
| P(3)-O(10)           | 1.562(3)   | P(3)-O(11)           | 1.588(2)   |
| O(1)-B(1)            | 1.474(4)   | O(3)-B(2)            | 1.459(4)   |
| O(4)-Co(1)#4         | 2.112(2)   | O(4)-K(2)#5          | 2.874(3)   |
| O(5)-B(1)            | 1.503(4)   | O(5)-P(2)#2          | 1.556(2)   |
| O(6)-B(1)            | 1.436(4)   | O(6)-B(2)#4          | 1.449(4)   |
| O(6)-Co(1)#4         | 2.158(2)   | O(7)-B(1)            | 1.510(4)   |
| O(7)-K(1)#8          | 2.802(2)   | O(8)-Co(1)#4         | 2.119(2)   |
| O(8)-K(2)#5          | 2.701(2)   | O(8)-K(1)#4          | 2.944(2)   |
| O(9)-B(2)#9          | 1.489(4)   | O(9)-K(1)#4          | 2.857(2)   |
| O(10)-B(2)           | 1.485(4)   | O(10)-K(1)#3         | 3.292(2)   |
| O(11)-K(2)#7         | 2.856(3)   | O(11)-K(1)#3         | 2.974(3)   |
| O(11)-H(11)          | 0.816(12)  | O(13)-Co(1)#7        | 2.081(2)   |
| O(14)-K(1)#1         | 2.604(4)   | O(14)-H(14A)         | 0.818(12)  |
| O(14)-H(14B)         | 0.8148     | B(2)-O(6)#3          | 1.449(4)   |
| B(2)-O(9)#10         | 1.489(4)   |                      |            |
| O(14)#1-K(1)-O(1)    | 159.40(11) | O(14)#1-K(1)-O(7)#2  | 103.20(10) |
| O(1)-K(1)-O(7)#2     | 86.19(7)   | O(14)#1-K(1)-O(9)#3  | 105.18(10) |
| O(1)-K(1)-O(9)#3     | 92.35(7)   | O(7)#2-K(1)-O(9)#3   | 93.27(7)   |
| O(14)#1-K(1)-O(8)#3  | 86.11(10)  | O(1)-K(1)-O(8)#3     | 97.06(7)   |
| O(7)#2-K(1)-O(8)#3   | 144.03(7)  | O(9)#3-K(1)-O(8)#3   | 50.90(6)   |
| O(14)#1-K(1)-O(11)#4 | 73.06(10)  | O(1)-K(1)-O(11)#4    | 87.13(7)   |
| O(7)#2-K(1)-O(11)#4  | 102.28(7)  | O(9)#3-K(1)-O(11)#4  | 164.37(7)  |
| O(8)#3-K(1)-O(11)#4  | 113.64(7)  | O(14)#1-K(1)-O(2)    | 115.12(10) |
| O(1)-K(1)-O(2)       | 51.14(7)   | O(7)#2-K(1)-O(2)     | 136.67(7)  |
| O(9)#3-K(1)-O(2)     | 95.43(7)   | O(8)#3-K(1)-O(2)     | 61.52(7)   |
| O(11)#4-K(1)-O(2)    | 72.15(7)   | O(14)#1-K(1)-O(10)#4 | 100.75(9)  |
| O(1)-K(1)-O(10)#4    | 67.26(6)   | O(7)#2-K(1)-O(10)#4  | 61.78(6)   |
| O(9)#3-K(1)-O(10)#4  | 147.61(7)  | O(8)#3-K(1)-O(10)#4  | 151.34(7)  |
| O(11)#4-K(1)-O(10)#4 | 44.90(6)   | O(2)-K(1)-O(10)#4    | 90.76(6)   |
| O(14)-K(2)-O(8)#5    | 102.03(10) | O(14)-K(2)-O(13)     | 144.49(10) |
| O(8)#5-K(2)-O(13)    | 70.99(7)   | O(14)-K(2)-O(11)#6   | 73.87(9)   |
| O(8)#5-K(2)-O(11)#6  | 123.72(8)  | O(13)-K(2)-O(11)#6   | 139.69(8)  |
| O(14)-K(2)-O(4)#5    | 84.78(9)   | O(8)#5-K(2)-O(4)#5   | 62.45(7)   |
| O(13)-K(2)-O(4)#5    | 60.79(7)   | O(11)#6-K(2)-O(4)#5  | 158.52(8)  |
| O(14)-K(2)-O(4)      | 84.95(10)  | O(8)#5-K(2)-O(4)     | 151.62(8)  |
| O(13)-K(2)-O(4)      | 87.26(7)   | O(11)#6-K(2)-O(4)    | 84.66(7)   |
| O(4)#5-K(2)-O(4)     | 91.31(7)   | O(14)-K(2)-O(12)     | 164.28(10) |
| O(8)#5-K(2)-O(12)    | 85.91(7)   | O(13)-K(2)-O(12)     | 50.92(7)   |
| O(11)#6-K(2)-O(12)   | 90.43(7)   | O(4)#5-K(2)-O(12)    | 110.93(7)  |
| O(4)-K(2)-O(12)      | 94.48(7)   | O(14)-K(2)-O(2)      | 108.84(10) |
| O(8)#5-K(2)-O(2)     | 145.02(8)  | O(13)-K(2)-O(2)      | 91.92(7)   |
| O(11)#6-K(2)-O(2)    | 53.66(7)   | O(4)#5-K(2)-O(2)     | 135.31(7)  |
| O(4)-K(2)-O(2)       | 49.93(6)   | O(12)-K(2)-O(2)      | 60.33(7)   |
| O(12)-Co(1)-O(13)#6  | 85.89(10)  | O(12)-Co(1)-O(4)#3   | 88.87(10)  |

|                      |            |                      |            |
|----------------------|------------|----------------------|------------|
| O(13)#6-Co(1)-O(4)#3 | 86.70(9)   | O(12)-Co(1)-O(8)#3   | 172.58(10) |
| O(13)#6-Co(1)-O(8)#3 | 99.44(10)  | O(4)#3-Co(1)-O(8)#3  | 86.29(9)   |
| O(12)-Co(1)-O(2)     | 94.05(10)  | O(13)#6-Co(1)-O(2)   | 88.74(9)   |
| O(4)#3-Co(1)-O(2)    | 174.39(9)  | O(8)#3-Co(1)-O(2)    | 91.25(9)   |
| O(12)-Co(1)-O(6)#3   | 91.24(10)  | O(13)#6-Co(1)-O(6)#3 | 175.64(9)  |
| O(4)#3-Co(1)-O(6)#3  | 96.53(9)   | O(8)#3-Co(1)-O(6)#3  | 83.72(9)   |
| O(2)-Co(1)-O(6)#3    | 88.19(9)   | O(4)-P(1)-O(2)       | 114.67(14) |
| O(4)-P(1)-O(3)       | 106.96(14) | O(2)-P(1)-O(3)       | 109.50(13) |
| O(4)-P(1)-O(1)       | 110.79(13) | O(2)-P(1)-O(1)       | 106.33(13) |
| O(3)-P(1)-O(1)       | 108.46(13) | O(8)-P(2)-O(9)       | 110.05(13) |
| O(8)-P(2)-O(5)#8     | 111.20(13) | O(9)-P(2)-O(5)#8     | 105.78(13) |
| O(8)-P(2)-O(7)       | 113.09(13) | O(9)-P(2)-O(7)       | 108.53(13) |
| O(5)#8-P(2)-O(7)     | 107.89(13) | O(12)-P(3)-O(13)     | 112.02(15) |
| O(12)-P(3)-O(10)     | 112.30(14) | O(13)-P(3)-O(10)     | 111.42(14) |
| O(12)-P(3)-O(11)     | 111.13(15) | O(13)-P(3)-O(11)     | 109.44(14) |
| O(10)-P(3)-O(11)     | 99.91(13)  | B(1)-O(1)-P(1)       | 129.7(2)   |
| B(2)-O(3)-P(1)       | 136.7(2)   | B(1)-O(5)-P(2)#2     | 127.5(2)   |
| B(1)-O(6)-B(2)#4     | 122.6(3)   | B(1)-O(7)-P(2)       | 129.3(2)   |
| B(2)#9-O(9)-P(2)     | 121.3(2)   | B(2)-O(10)-P(3)      | 124.5(2)   |
| P(3)-O(11)-H(11)     | 108(3)     | K(2)#7-O(11)-H(11)   | 82(3)      |
| K(1)#3-O(11)-H(11)   | 140(3)     | K(1)#1-O(14)-H(14A)  | 112(3)     |
| K(2)-O(14)-H(14A)    | 115(3)     | K(1)#1-O(14)-H(14B)  | 125.5      |
| K(2)-O(14)-H(14B)    | 111.0      | H(14A)-O(14)-H(14B)  | 87.6       |
| O(6)-B(1)-O(1)       | 113.8(3)   | O(6)-B(1)-O(5)       | 112.5(3)   |
| O(1)-B(1)-O(5)       | 103.6(3)   | O(6)-B(1)-O(7)       | 109.9(3)   |
| O(1)-B(1)-O(7)       | 106.9(3)   | O(5)-B(1)-O(7)       | 109.8(3)   |
| O(6)#3-B(2)-O(3)     | 113.8(3)   | O(6)#3-B(2)-O(10)    | 111.1(3)   |
| O(3)-B(2)-O(10)      | 109.0(3)   | O(6)#3-B(2)-O(9)#10  | 111.8(3)   |
| O(3)-B(2)-O(9)#10    | 104.2(3)   | O(10)-B(2)-O(9)#10   | 106.5(3)   |

Symmetry transformations used to generate equivalent atoms:

|                          |                           |
|--------------------------|---------------------------|
| #1 $-x+1, -y+1, -z+1$    | #2 $x-1/2, y, -z+3/2$     |
| #3 $-x+3/2, y+1/2, z$    | #4 $-x+3/2, y-1/2, z$     |
| #5 $-x+2, -y+1, -z+1$    | #6 $x-1/2, -y+3/2, -z+1$  |
| #7 $x+1/2, -y+3/2, -z+1$ | #8 $x+1/2, y, -z+3/2$     |
| #9 $-x+2, y-1/2, -z+3/2$ | #10 $-x+2, y+1/2, -z+3/2$ |

**Table S2.** Selected bond lengths [ $\text{\AA}$ ] and angles [deg] for **1-a**.

|             |          |            |          |
|-------------|----------|------------|----------|
| Co(1)-O(13) | 2.011(2) | Co(1)-O(5) | 2.071(2) |
| Co(1)-O(1)  | 2.088(2) | Co(1)-O(7) | 2.089(2) |
| Co(1)-O(10) | 2.150(2) | Co(1)-O(2) | 2.194(2) |



|                    |            |                   |            |
|--------------------|------------|-------------------|------------|
| P(2)-O(10)         | 1.494(2)   | P(2)-O(4)         | 1.550(2)   |
| P(2)-O(8)          | 1.556(2)   | P(2)-O(12)#4      | 1.559(2)   |
| K(3)-O(11)         | 2.711(2)   | K(3)-O(4)         | 2.807(2)   |
| K(3)-O(12)         | 2.834(2)   | K(3)-O(14)        | 2.917(3)   |
| K(3)-O(1)          | 2.929(2)   | K(3)-O(10)        | 2.951(2)   |
| K(3)-O(6)          | 3.259(2)   | P(4)-O(13)#6      | 1.492(3)   |
| P(4)-O(7)#3        | 1.500(2)   | P(4)-O(6)         | 1.558(2)   |
| P(4)-O(14)         | 1.598(2)   | P(5)-O(5)#6       | 1.507(2)   |
| P(5)-O(1)          | 1.522(2)   | P(5)-O(9)         | 1.546(2)   |
| P(5)-O(11)         | 1.563(2)   | O(1)-K(0AB)#3     | 3.178(6)   |
| O(2)-B(2)          | 1.434(4)   | O(2)-B(15)        | 1.457(4)   |
| K(0AA)-O(5)#9      | 2.619(4)   | K(0AA)-O(5)#10    | 2.766(5)   |
| K(0AA)-O(14)       | 2.845(5)   | K(0AA)-O(10)#9    | 2.900(8)   |
| K(0AA)-O(7)#10     | 2.914(11)  | K(0AA)-O(9)#11    | 3.257(11)  |
| K(0AA)-O(8)#9      | 3.370(5)   | K(0AA)-O(7)#9     | 3.386(14)  |
| O(4)-B(15)#13      | 1.491(4)   | O(5)-P(5)#14      | 1.507(2)   |
| O(5)-K(0AA)#1      | 2.619(4)   | O(5)-K(0AB)#2     | 2.763(4)   |
| O(5)-K(0AA)#2      | 2.766(5)   | O(5)-K(0AB)#1     | 2.774(6)   |
| O(6)-B(15)#6       | 1.485(4)   | O(7)-P(4)#3       | 1.500(2)   |
| O(7)-K(0AB)#1      | 2.852(5)   | O(7)-K(0AA)#2     | 2.914(11)  |
| O(7)-K(0AA)#1      | 3.386(14)  | O(8)-B(2)#13      | 1.496(4)   |
| O(8)-K(0AA)#1      | 3.370(5)   | O(9)-B(15)        | 1.454(4)   |
| O(9)-K(0AA)#8      | 3.257(11)  | O(10)-K(0AB)#1    | 2.620(4)   |
| O(10)-K(0AA)#1     | 2.900(8)   | O(11)-B(2)#6      | 1.478(4)   |
| O(12)-B(2)#5       | 1.506(4)   | O(12)-P(2)#5      | 1.559(2)   |
| O(13)-P(4)#14      | 1.492(2)   | O(13)-K(0AB)#3    | 3.118(10)  |
| O(14)-K(0AB)       | 2.672(5)   | O(14)-H(14)       | 0.82(2)    |
| B(15)-O(6)#14      | 1.485(4)   | B(15)-O(4)#15     | 1.491(4)   |
| B(2)-O(11)#14      | 1.478(4)   | B(2)-O(8)#15      | 1.497(4)   |
| B(2)-O(12)#4       | 1.506(4)   | K(0AB)-O(10)#9    | 2.620(4)   |
| K(0AB)-O(5)#10     | 2.763(4)   | K(0AB)-O(5)#9     | 2.774(6)   |
| K(0AB)-O(7)#9      | 2.852(5)   | K(0AB)-O(13)#3    | 3.118(10)  |
| K(0AB)-O(1)#3      | 3.178(6)   |                   |            |
| O(13)-Co(1)-O(5)   | 90.94(10)  | O(13)-Co(1)-O(1)  | 96.64(10)  |
| O(5)-Co(1)-O(1)    | 172.09(9)  | O(13)-Co(1)-O(7)  | 86.92(10)  |
| O(5)-Co(1)-O(7)    | 86.16(8)   | O(1)-Co(1)-O(7)   | 91.98(8)   |
| O(13)-Co(1)-O(10)  | 171.94(9)  | O(5)-Co(1)-O(10)  | 85.41(8)   |
| O(1)-Co(1)-O(10)   | 87.34(8)   | O(7)-Co(1)-O(10)  | 99.97(9)   |
| O(13)-Co(1)-O(2)   | 90.07(9)   | O(5)-Co(1)-O(2)   | 95.70(8)   |
| O(1)-Co(1)-O(2)    | 86.57(8)   | O(7)-Co(1)-O(2)   | 176.49(9)  |
| O(10)-Co(1)-O(2)   | 83.16(8)   | O(10)-P(2)-O(4)   | 110.26(12) |
| O(10)-P(2)-O(8)    | 110.59(12) | O(4)-P(2)-O(8)    | 106.25(11) |
| O(10)-P(2)-O(12)#4 | 113.33(11) | O(4)-P(2)-O(12)#4 | 108.75(11) |
| O(8)-P(2)-O(12)#4  | 107.37(11) | O(11)-K(3)-O(4)   | 88.71(6)   |

|                        |            |                        |            |
|------------------------|------------|------------------------|------------|
| O(11)-K(3)-O(12)       | 81.39(6)   | O(4)-K(3)-O(12)        | 89.78(6)   |
| O(11)-K(3)-O(14)       | 90.20(7)   | O(4)-K(3)-O(14)        | 168.18(7)  |
| O(12)-K(3)-O(14)       | 101.69(7)  | O(11)-K(3)-O(1)        | 51.51(6)   |
| O(4)-K(3)-O(1)         | 92.40(6)   | O(12)-K(3)-O(1)        | 132.75(6)  |
| O(14)-K(3)-O(1)        | 77.77(7)   | O(11)-K(3)-O(10)       | 95.84(6)   |
| O(4)-K(3)-O(10)        | 51.35(6)   | O(12)-K(3)-O(10)       | 141.13(6)  |
| O(14)-K(3)-O(10)       | 117.12(7)  | O(1)-K(3)-O(10)        | 59.69(6)   |
| O(11)-K(3)-O(6)        | 67.44(6)   | O(4)-K(3)-O(6)         | 143.40(6)  |
| O(12)-K(3)-O(6)        | 60.49(6)   | O(14)-K(3)-O(6)        | 45.30(6)   |
| O(1)-K(3)-O(6)         | 93.43(6)   | O(10)-K(3)-O(6)        | 152.64(6)  |
| O(13)#6-P(4)-O(7)#3    | 112.38(15) | O(13)#6-P(4)-O(6)      | 112.37(13) |
| O(7)#3-P(4)-O(6)       | 112.49(13) | O(13)#6-P(4)-O(14)     | 109.74(16) |
| O(7)#3-P(4)-O(14)      | 110.13(14) | O(6)-P(4)-O(14)        | 98.93(12)  |
| O(5)#6-P(5)-O(1)       | 113.45(13) | O(5)#6-P(5)-O(9)       | 106.46(12) |
| O(1)-P(5)-O(9)         | 111.65(12) | O(5)#6-P(5)-O(11)      | 111.25(11) |
| O(1)-P(5)-O(11)        | 105.67(12) | O(9)-P(5)-O(11)        | 108.32(12) |
| O(5)#9-K(0AA)-O(5)#10  | 101.14(17) | O(8)#9-K(0AA)-O(7)#9   | 108.0(2)   |
| O(5)#9-K(0AA)-O(14)    | 161.7(6)   | O(5)#10-K(0AA)-O(14)   | 82.09(16)  |
| O(5)#9-K(0AA)-O(10)#9  | 62.25(14)  | O(5)#10-K(0AA)-O(10)#9 | 137.0(6)   |
| O(14)-K(0AA)-O(10)#9   | 103.1(3)   | O(5)#9-K(0AA)-O(7)#10  | 87.5(2)    |
| O(5)#10-K(0AA)-O(7)#10 | 59.97(12)  | O(14)-K(0AA)-O(7)#10   | 109.3(2)   |
| O(10)#9-K(0AA)-O(7)#10 | 145.9(3)   | O(5)#9-K(0AA)-O(9)#11  | 47.68(15)  |
| O(5)#10-K(0AA)-O(9)#11 | 116.2(2)   | O(14)-K(0AA)-O(9)#11   | 146.3(5)   |
| O(10)#9-K(0AA)-O(9)#11 | 82.96(12)  | O(7)#10-K(0AA)-O(9)#11 | 64.2(3)    |
| O(5)#9-K(0AA)-O(8)#9   | 88.61(11)  | O(5)#10-K(0AA)-O(8)#9  | 169.95(14) |
| O(14)-K(0AA)-O(8)#9    | 87.89(9)   | O(10)#9-K(0AA)-O(8)#9  | 46.40(7)   |
| O(7)#10-K(0AA)-O(8)#9  | 123.6(5)   | O(9)#11-K(0AA)-O(8)#9  | 72.25(18)  |
| O(5)#9-K(0AA)-O(7)#9   | 54.7(2)    | O(5)#10-K(0AA)-O(7)#9  | 76.3(3)    |
| O(14)-K(0AA)-O(7)#9    | 109.7(4)   | O(10)#9-K(0AA)-O(7)#9  | 61.6(2)    |
| O(7)#10-K(0AA)-O(7)#9  | 114.70(14) | O(9)#11-K(0AA)-O(7)#9  | 102.37(12) |
| B(15)#13-O(4)-P(2)     | 120.65(17) | B(15)#6-O(6)-P(4)      | 122.31(19) |
| B(2)#13-O(8)-P(2)      | 125.38(18) | B(15)-O(9)-P(5)        | 135.41(19) |
| B(2)#6-O(11)-P(5)      | 127.15(18) | B(2)#5-O(12)-P(2)#5    | 128.68(18) |
| P(4)-O(14)-H(14)       | 112(5)     | K(0AB)-O(14)-H(14)     | 95(5)      |
| K(0AA)-O(14)-H(14)     | 96(6)      | K(3)-O(14)-H(14)       | 125(5)     |
| O(9)-B(15)-O(2)        | 112.4(2)   | O(9)-B(15)-O(6)#14     | 108.9(2)   |
| O(2)-B(15)-O(6)#14     | 111.7(2)   | O(9)-B(15)-O(4)#15     | 105.9(2)   |
| O(2)-B(15)-O(4)#15     | 110.5(2)   | O(6)#14-B(15)-O(4)#15  | 107.1(2)   |
| O(2)-B(2)-O(11)#14     | 113.0(2)   | O(2)-B(2)-O(8)#15      | 113.5(2)   |
| O(11)#14-B(2)-O(8)#15  | 103.8(2)   | O(2)-B(2)-O(12)#4      | 110.2(2)   |
| O(11)#14-B(2)-O(12)#4  | 107.1(2)   | O(8)#15-B(2)-O(12)#4   | 108.8(2)   |
| O(10)#9-K(0AB)-O(14)   | 116.4(2)   | O(10)#9-K(0AB)-O(5)#10 | 156.64(12) |
| O(14)-K(0AB)-O(5)#10   | 85.36(9)   | O(10)#9-K(0AB)-O(5)#9  | 64.04(9)   |
| O(14)-K(0AB)-O(5)#9    | 164.3(3)   | O(5)#10-K(0AB)-O(5)#9  | 97.4(2)    |

|                        |            |                       |            |
|------------------------|------------|-----------------------|------------|
| O(10)#9-K(0AB)-O(7)#9  | 72.65(13)  | O(14)-K(0AB)-O(7)#9   | 135.0(4)   |
| O(5)#10-K(0AB)-O(7)#9  | 86.05(9)   | O(5)#9-K(0AB)-O(7)#9  | 60.65(8)   |
| O(10)#9-K(0AB)-O(13)#3 | 81.2(2)    | O(14)-K(0AB)-O(13)#3  | 87.4(3)    |
| O(5)#10-K(0AB)-O(13)#3 | 92.13(17)  | O(5)#9-K(0AB)-O(13)#3 | 107.87(15) |
| O(7)#9-K(0AB)-O(13)#3  | 48.98(14)  | O(10)#9-K(0AB)-O(1)#3 | 136.6(4)   |
| O(14)-K(0AB)-O(1)#3    | 52.70(11)  | O(5)#10-K(0AB)-O(1)#3 | 49.86(8)   |
| O(5)#9-K(0AB)-O(1)#3   | 138.90(10) | O(7)#9-K(0AB)-O(1)#3  | 89.32(18)  |
| O(13)#3-K(0AB)-O(1)#3  | 58.18(16)  |                       |            |

---

Symmetry transformations used to generate equivalent atoms:

- #1  $-x+1/2, y-1/2, z$     #2  $x+1/2, -y+1/2, -z+1$   
#3  $-x+1, -y+1, -z+1$     #4  $-x+1, y-1/2, -z+3/2$   
#5  $-x+1, y+1/2, -z+3/2$     #6  $-x+3/2, y+1/2, z$   
#7  $x+1/2, -y+3/2, -z+1$     #8  $x+1, y, z$     #9  $-x+1/2, y+1/2, z$   
#10  $x-1/2, -y+1/2, -z+1$     #11  $x-1, y, z$   
#12  $-x, -y+1, -z+1$     #13  $x-1/2, y, -z+3/2$   
#14  $-x+3/2, y-1/2, z$     #15  $x+1/2, y, -z+3/2$   
#16  $x-1/2, -y+3/2, -z+1$
